# Supplementary figures and images for: Iron(iii) chloride hexahydrate-promoted selective hydroxylation and chlorination of benzyl ketone derivatives for the construction of hetero-quaternary scaffolds
Source: Royal Society of Chemistry journal article supplement (doi:10.1039/c6ob01733a), 2016-01-01

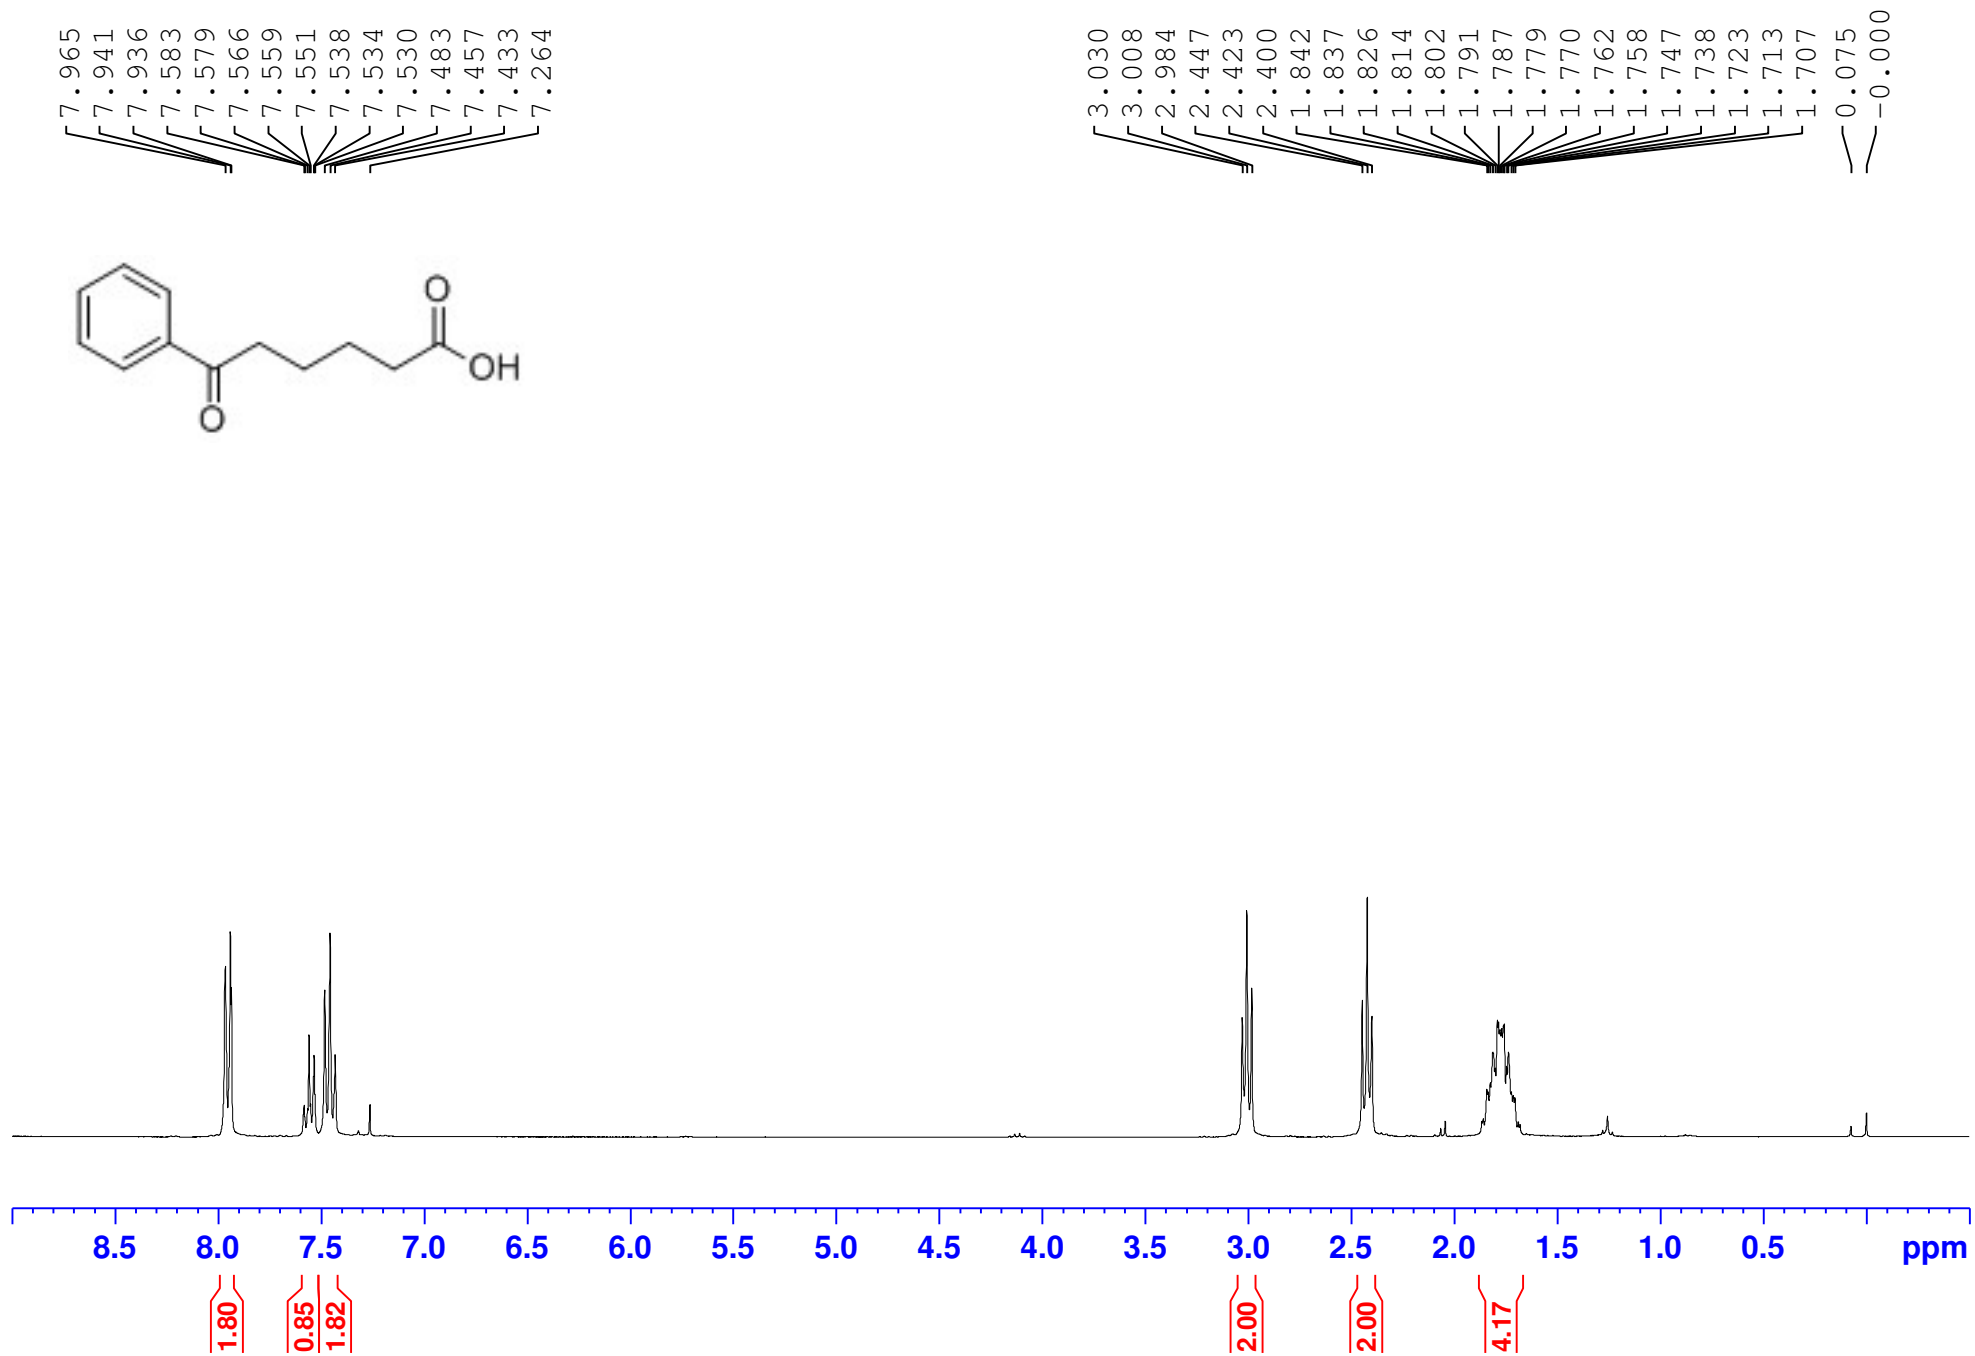

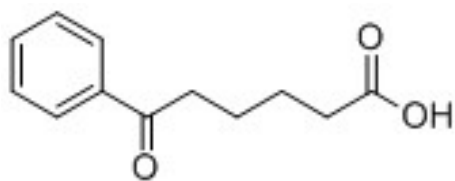

199.99

179.56

137.06

133.16

128.73

128.16

77.48

77.16

76.84

38.20

33.97

24.43

23.68

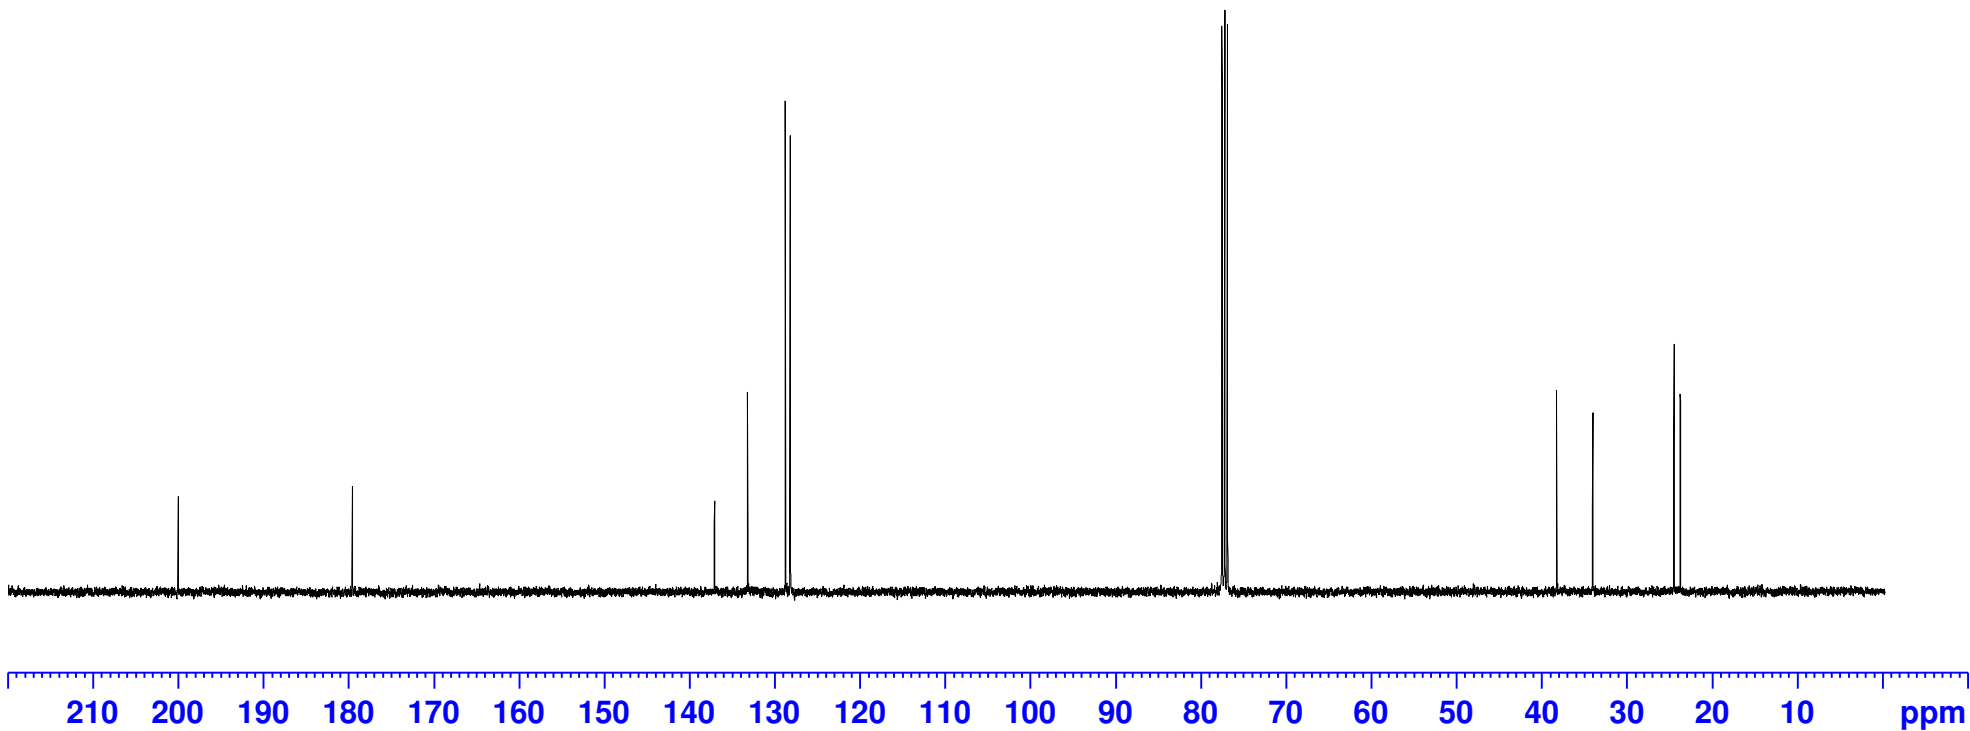

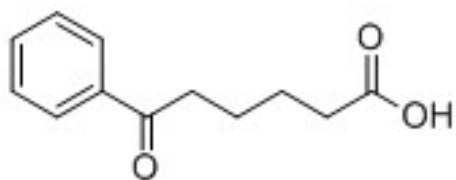

133.16  
128.73  
128.16

38.20  
33.97

24.43  
23.68

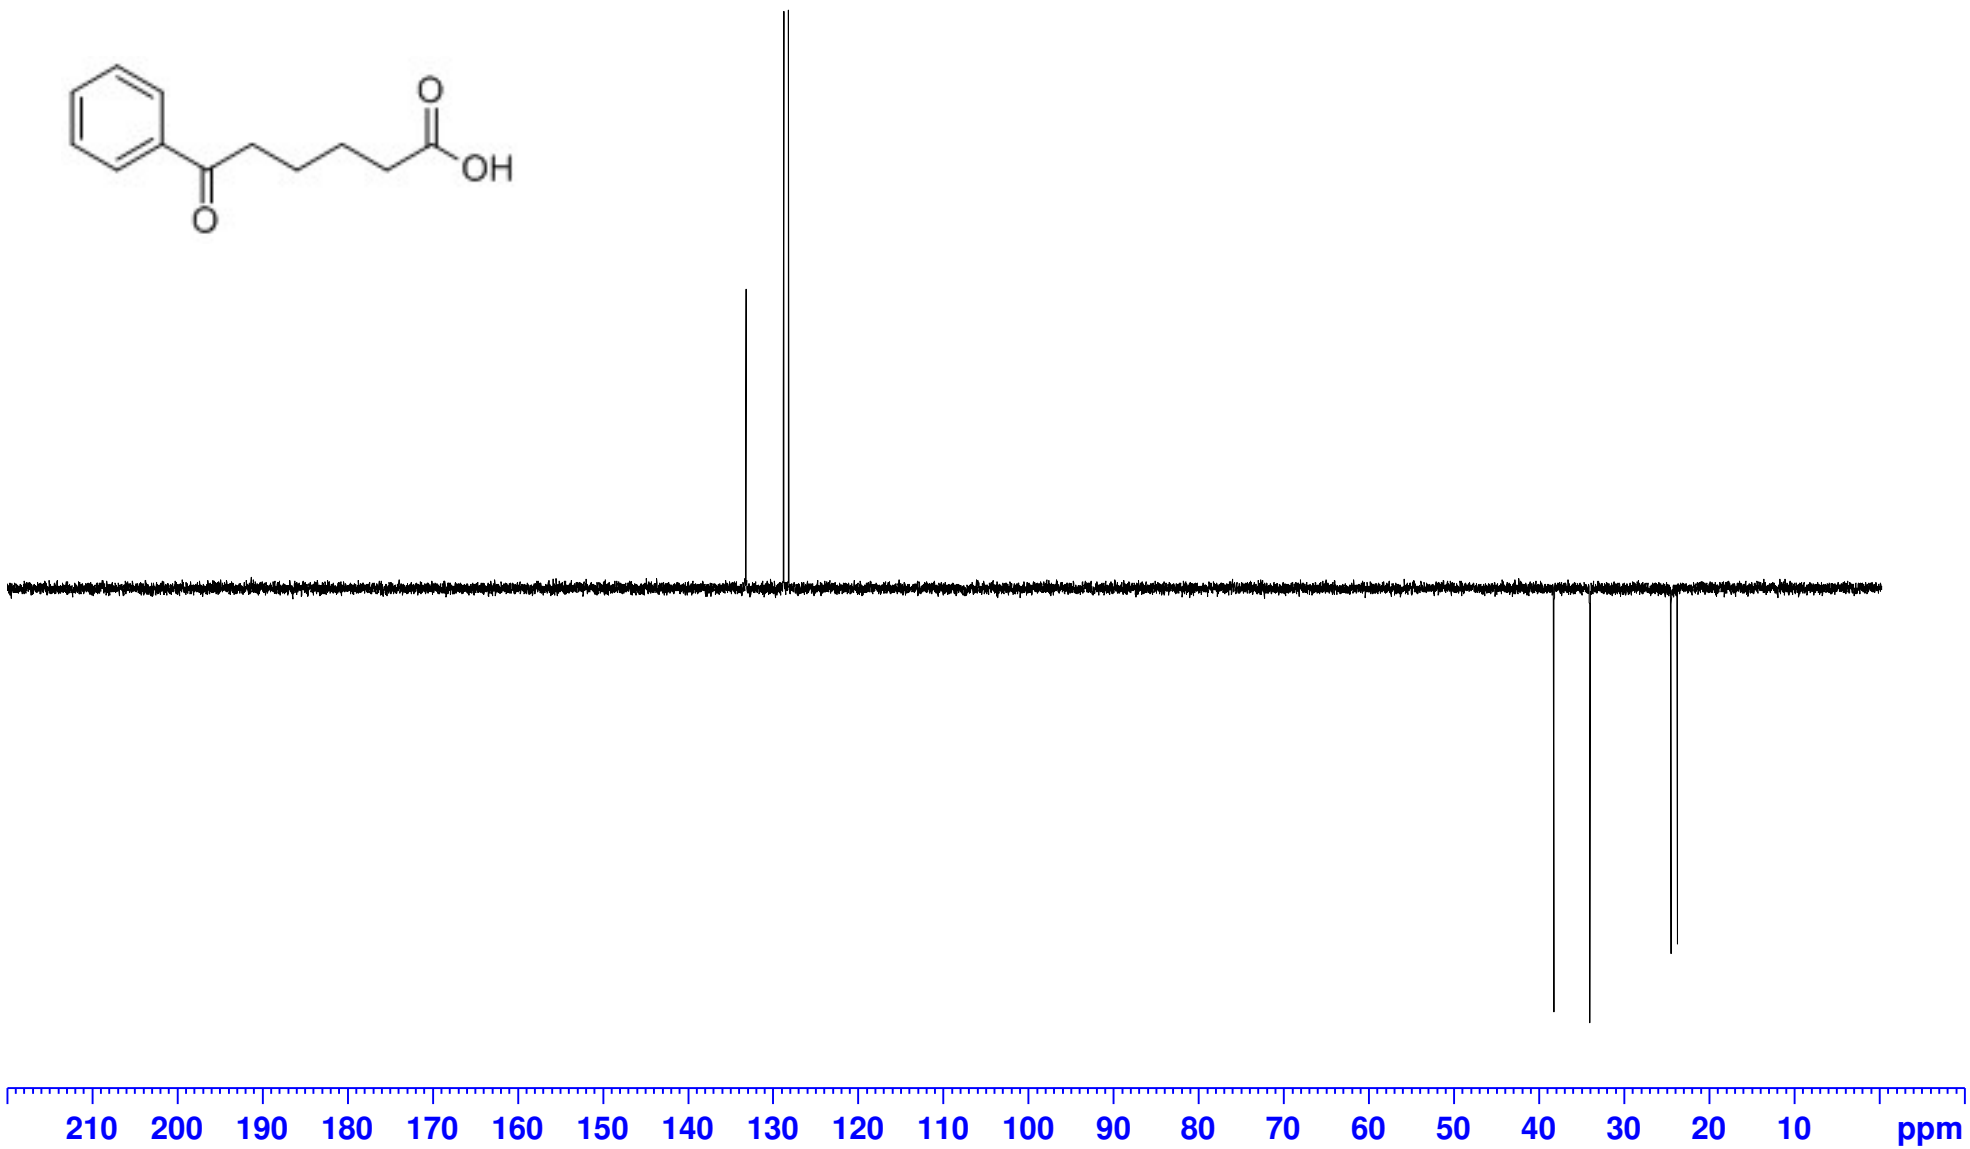

Supplement: c6ob01733a1.pdf [file c6ob01733a1.pdf]
